# Supplementary material for: Physicochemical Characterization and Antimicrobial Activity against Erwinia amylovora, Erwinia vitivora, and Diplodia seriata of a Light Purple Hibiscus syriacus L. Cultivar
Source: MDPI journal article supplement (doi:10.3390/plants10091876), 2021-09-10
Supplement: s1 [file s1]

# Physicochemical characterization and antimicrobial activity against *Erwinia amylovora*, *Erwinia vitivora*, and *Diplodia seriata* of a light purple *Hibiscus syriacus* L. cultivar

E. Sánchez-Hernández, L. Buzón-Durán, B. Lorenzo-Vidal, J. Martín-Gil and P. Martín-Ramos

## SUPPORTING INFORMATION

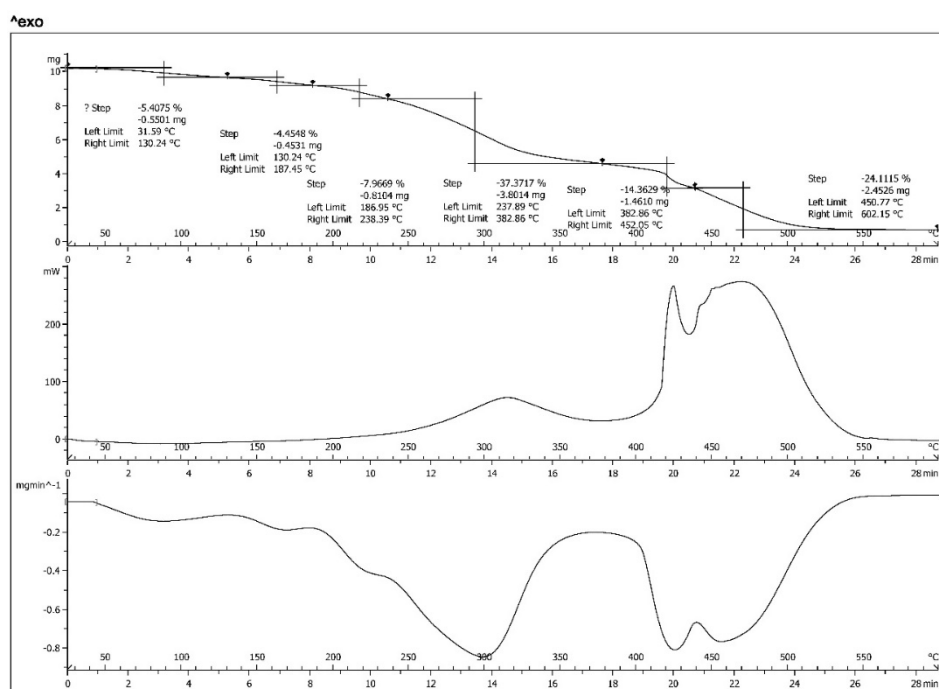

Figure S1. DSC and TG curves of *Hibiscus syriacus* flowers

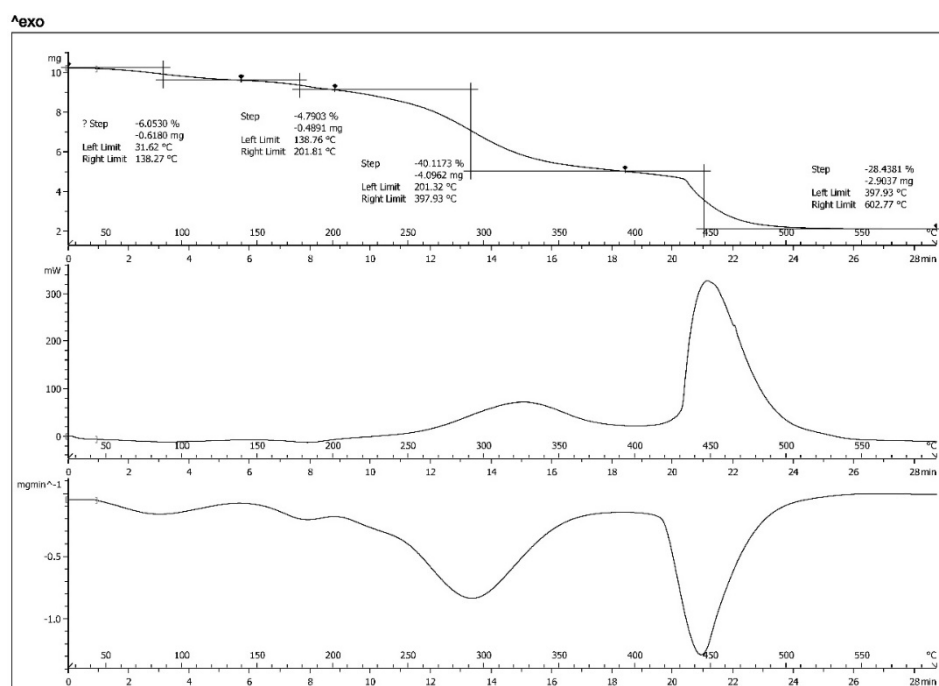

Figure S2. DSC and TG curves of *Hibiscus syriacus* leaves

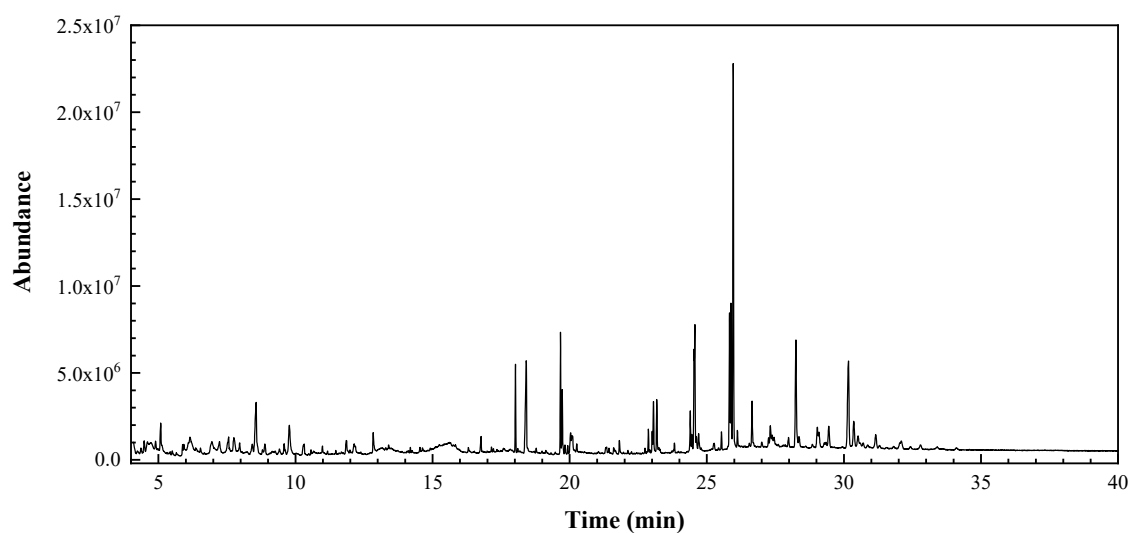

**Figure S3.** GC–MS chromatogram of *Hibiscus syriacus* flower hydromethanolic extract

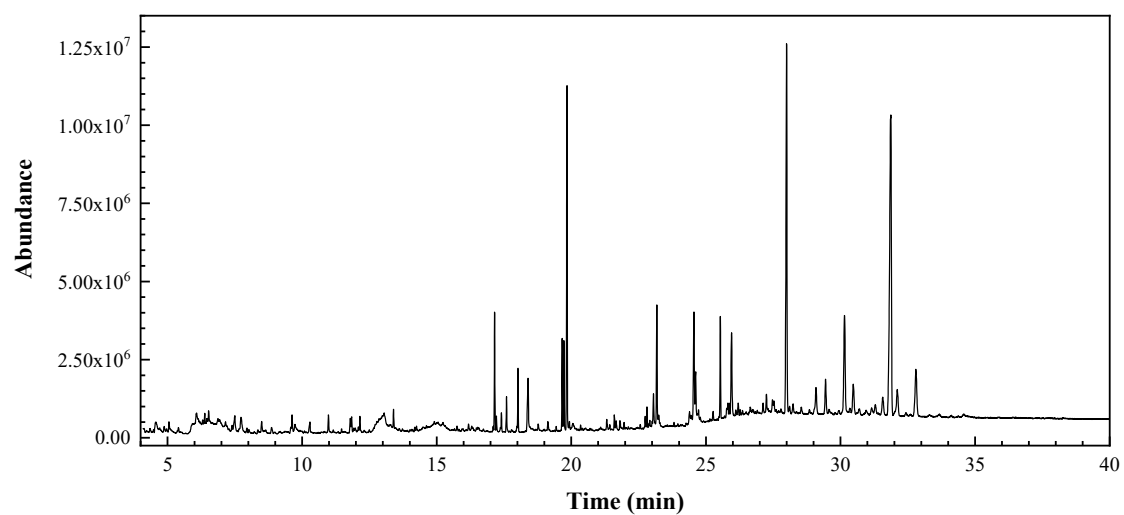

**Figure S4.** GC–MS chromatogram of *Hibiscus syriacus* leaf hydromethanolic extract

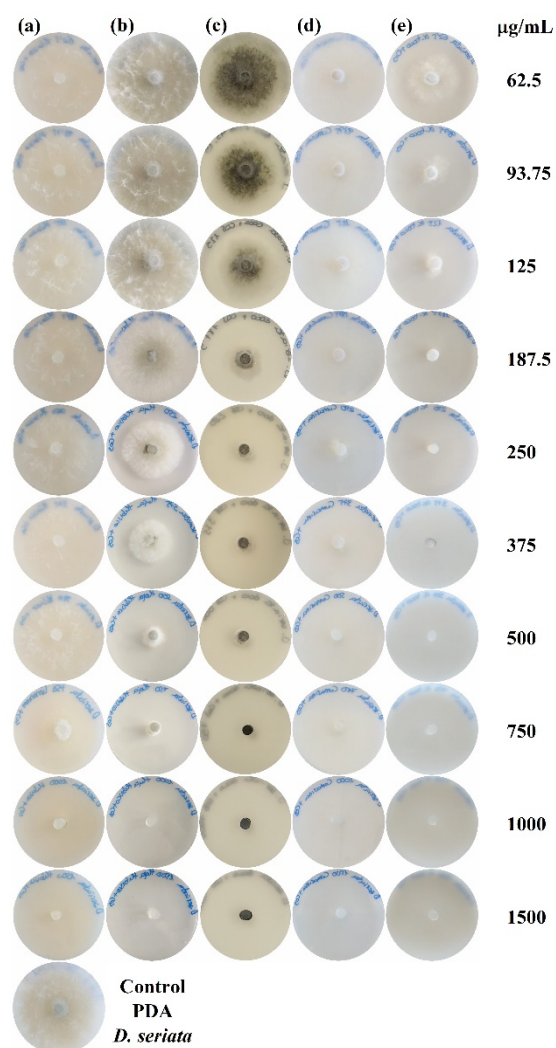

**Figure S5.** Growth inhibition of *D. seriata* for the conjugate complexes under study: **(a)** COS–flower extract; **(b)** COS–leaf extract; **(c)** COS–heptacosanol; **(d)** COS–DHTMC; **(e)** COS–vitamin E. Treatment doses from top to bottom: 62.5, 93.75, 125, 187.5, 250, 375, 500, 750, 1000 and 1500  $\mu\text{g}\cdot\text{mL}^{-1}$ . The control (PDA medium without amendments) is shown in the bottom left corner. Only one replicate is shown.
